Systems biology

# Cancer subtype identification by consensus guided graph autoencoders

Cheng Liang <sup>1,\*</sup>, Mingchao Shang<sup>1</sup> and Jiawei Luo<sup>2,\*</sup>

<sup>1</sup>School of Information Science and Engineering, Shandong Normal University, Jinan 250358, China and <sup>2</sup>College of Computer Science and Electronic Engineering, Hunan University, Changsha 410082, China

\*To whom correspondence should be addressed.

Associate Editor: Janet Kelso

Received on December 10, 2020; revised on June 22, 2021; editorial decision on July 16, 2021; accepted on July 19, 2021

## Abstract

**Motivation:** Cancer subtype identification aims to divide cancer patients into subgroups with distinct clinical phenotypes and facilitate the development for subgroup specific therapies. The massive amount of multi-omics datasets accumulated in the public databases have provided unprecedented opportunities to fulfill this task. As a result, great computational efforts have been made to accurately identify cancer subtypes via integrative analysis of these multi-omics datasets.

**Results:** In this article, we propose a Consensus Guided Graph Autoencoder (CGGA) to effectively identify cancer subtypes. First, we learn for each omic a new feature matrix by using graph autoencoders, where both structure information and node features can be effectively incorporated during the learning process. Second, we learn a set of omic-specific similarity matrices together with a consensus matrix based on the features obtained in the first step. The learned omic-specific similarity matrices are then fed back to the graph autoencoders to guide the feature learning. By iterating the two steps above, our method obtains a final consensus similarity matrix for cancer subtyping. To comprehensively evaluate the prediction performance of our method, we compare CGGA with several approaches ranging from general-purpose multi-view clustering algorithms to multi-omics-specific integrative methods. The experimental results on both generic datasets and cancer datasets confirm the superiority of our method. Moreover, we validate the effectiveness of our method in leveraging multi-omics datasets to identify cancer subtypes. In addition, we investigate the clinical implications of the obtained clusters for glioblastoma and provide new insights into the treatment for patients with different subtypes.

**Availability and implementation:** The source code of our method is freely available at <https://github.com/alcs417/CGGA>.

**Contact:** [alcs417@sdu.edu.cn](mailto:alcs417@sdu.edu.cn) or [luojiawei@hnu.edu.cn](mailto:luojiawei@hnu.edu.cn)

**Supplementary information:** [Supplementary data](#) are available at *Bioinformatics* online.

## 1 Introduction

Cancer is a type of disease that involves abnormal cell growth and can potentially invade or spread to other organisms of the body. As one of the leading causes of death worldwide, its heterogeneity is considered as the major problem limiting the efficacy of targeted therapies and compromising treatment outcomes (Janku, 2014). Cancer subtype identification aims to divide patients into groups with similar clinical phenotypes or molecular profiles, thus facilitating the prognosis and personalized treatment prediction in cancer (Huang *et al.*, 2019; Kuijjer *et al.*, 2018). For instance, it is now well-recognized that there are four main subtypes in breast cancer, i.e. Luminal A, Luminal B, Basal and HER2, each of which has distinct morphologies and responds differently to both targeted and chemotherapeutic agents (Dai *et al.*, 2015; Salvadores *et al.*, 2020).

With the rapid development of high-throughput sequencing techniques, large-scale projects such as The Cancer Genome Atlas (TCGA) have accumulated massive amount of diverse omics data for various cancer types (Cancer Genome Atlas Research Network *et al.*, 2013; Speicher and Pfeifer, 2015). As a result, great computational efforts have been made to accurately identify cancer subtypes by integrative analysis of these multi-omics data (Chen *et al.*, 2019; Rappoport and Shamir, 2018; Tepeli *et al.*, 2020). Since the subtypes of most cancer samples are unclear, clustering has been widely used for cancer subtyping (Xu *et al.*, 2019). Early methods generally make predictions by employing only one type of multi-omics data or directly concatenating all omics data followed by traditional single-omic clustering algorithms (e.g. *k*-means). However, this approach cannot fully exploit the underlying connections among different

types of omics data and might lead to inaccurate results. Moreover, the simple concatenation strategy will also increase the data dimension and thus reduce the computational efficiency.

Multi-view clustering has recently become a hot topic in the field of machine learning (Nie *et al.*, 2018; Xu *et al.*, 2016). The goal of multi-view clustering is to make use of heterogeneous information from different views to provide a comprehensive result (Tang *et al.*, 2019; Wang *et al.*, 2020a,b). To take advantage of multi-omics datasets and understand sample characteristics from a more comprehensive perspective, many methods based on multi-view clustering have been developed to uncover potential subtypes in cancers (Jiang *et al.*, 2019a,b; Li *et al.*, 2018; Nguyen and Wang, 2020). According to the underlying model assumptions, existing cancer subtyping approaches can be roughly divided into several categories. Algorithms in the first category mainly utilize statistical models to fulfill the task (Vaske *et al.*, 2010). One of the representative works is iCluster (Shen *et al.*, 2009), a joint latent variable model for integrative clustering which simultaneously incorporates flexible modeling of the associations between different data types and reduces the dimensionality of the datasets. Although powerful, this method has a high computational cost with respect to the number of features and is relatively sensitive to the feature preselection step. LRACluster is an integrative probabilistic model to fast find the shared principal subspace across multiple data types by using low-rank approximation. Specifically, samples were clustered in a reduced low-dimensional subspace to identify the molecular subtypes (Wu *et al.*, 2015). Another group of identification methods are generally based on multi-view similarity learning and different integration strategies are adopted to obtain the cluster labels for patients. Wang *et al.* first computed a sample-similarity network for each data type and then fused these networks into a single similarity network non-linearly (Wang *et al.*, 2014). Finally, spectral clustering was applied on the obtained similarity network to get the results for cancer subtyping. In this way, the complementarity in the data were well explored. Cai *et al.* tried to find a consensus kernel matrix from a set of kernel matrices constructed for each data type. To solve the inconsistency among different views, they decomposed each kernel matrix into a consensus part together with a disagreement part and further defined a consensus score to measure the consistency (Cai and Li, 2017). In addition to the methods mentioned above, other representative subtyping methods include PINS (Nguyen *et al.*, 2017), iNMF (Yang and Michailidis, 2016), JIVE (O'Connell and Lock, 2016) and so on. PINS discovered meaningful cancer subtypes based on perturbation clustering. The main idea is to repeatedly perturb the data by adding Gaussian noise and find the sample partitions that are least affected by the perturbations. iNMF is based on joint non-negative matrix factorization and can leverage the advantage of multiple data sources to gain robustness to heterogeneous perturbations. JIVE extends the principal components analysis to multi-source scenario and finds the joint structure by quantifying the amount of shared variation between data sources.

Although great computational efforts have been made in the past decade, it still remains a challenging task to discover biologically meaningful subgroups in cancer samples. Specifically, most of the existing methods only consider either the feature content or the graph structure of samples during the identification process, which cannot fully exploit the clustering information hidden in the samples. Besides, the graph structures used by many alternatives are constructed directly from the feature contents and are fixed throughout the optimization process, which might lead to sub-optimal performances due to the existence of noise in omics data and impedes the consistency sharing among multiple views. To solve these issues, in this article, we propose a Consensus Guided Graph Autoencoder (CGGA) to effectively identify cancer subtypes. Our method mainly consists of two steps. First, we learn for each omic a new feature matrix by using graph autoencoders, where both the structure information and node features are simultaneously considered during the learning process. Second, we learn a set of omic-specific similarity matrices as well as a consensus matrix based on the features obtained in the first step. Then, the learned omic-specific similarity

matrices are fed back to the graph autoencoders to guide the feature learning. By iterating the two steps above, our method obtains a final consensus similarity matrix for cancer subtyping. Experimental results on both generic machine learning datasets and cancer datasets confirm the effectiveness of our method. Moreover, the survival analysis as well as the enrichment analysis based on the subgroups uncovered in glioblastoma provides new insights into the importance of cancer subtype identification.

## 2 Materials and methods

As aforementioned, our proposed algorithm consists of two parts, i.e. latent representation learning by GAEs and adaptive similarity graph learning based on the obtained representations (Fig. 1). The two parts are enhanced with each other in an iterative manner. We will first summarize the notations used in our work and then give details of each part in the following subsections.

### 2.1 Basic notations

Throughout the article, we use *italic* uppercase letters to denote matrices. Given a matrix  $M$ , its  $j$ th column and  $(i, j)$ th element are denoted as  $m_j$  and  $m_{ij}$ , respectively.  $M^T$ ,  $\text{Tr}(M)$  and  $\|M\|_F$  denote the transpose, the trace and the Frobenius norm of  $M$ , respectively.  $\mathbf{1}$  is a column vector with all ones and  $I$  is the identity matrix.

### 2.2 Graph autoencoders and its optimization

#### 2.2.1 Graph convolutional networks

Graph Convolutional Networks (GCNs) are an efficient variant of Convolutional Neural Networks (CNNs) on graphs and have been widely used in various semi-supervised learning tasks (Kipf and Welling, 2016a,b; Wu *et al.*, 2019). Given an attributed graph  $G(X, A)$ , where  $X = [x_1; x_2; \dots; x_n] \in \mathbb{R}^{n \times d}$  is the node feature matrix and  $A \in \mathbb{R}^{n \times n}$  encodes the similarities between each pair of nodes, a GCN aims to learn a latent representation  $Z = [z_1; z_2; \dots; z_n] \in \mathbb{R}^{n \times p}$  ( $p \leq d$ ) by simultaneously considering both the node features  $X$  and the graph structure  $A$  (Jiang *et al.*, 2019a,b). Specifically, the layer-wise propagation rule of GCNs is:

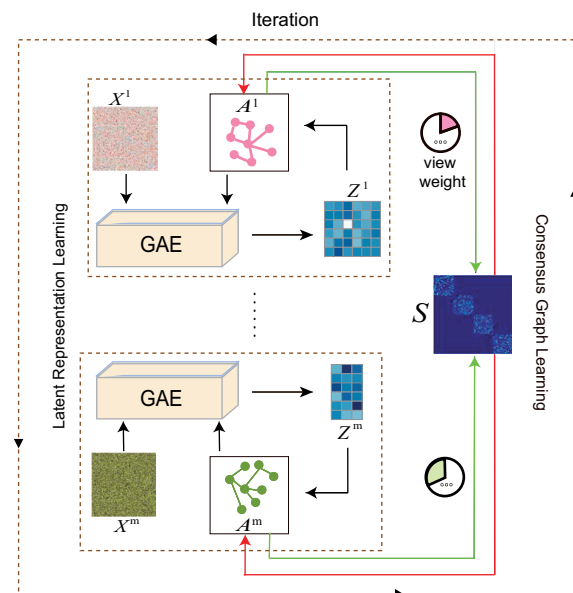

Fig. 1. An overall workflow of the proposed method. It iterates between two parts, i.e. latent representation learning and consensus graph learning, until convergence

$$Z^{l+1} = \sigma(\tilde{A}Z^l W^l), \quad (1)$$

where  $Z^l \in \mathbb{R}^{n \times d_l}$  is the input feature matrix at the  $l$ th layer and  $Z^0 = X$ .  $W^l \in \mathbb{R}^{d_l \times d_{l+1}}$  is a trainable weight matrix at the  $l$ th layer.  $\tilde{A} = \tilde{D}^{-1}(A + I_n)\tilde{D}^{-\frac{1}{2}}$  and  $\tilde{D}$  is a diagonal matrix with its  $i$ th element defined as  $\tilde{D}_{ii} = \sum_k (A + I_n)_{ik}$ .  $\sigma(\cdot)$  is an activation function such as ReLU. Based on Equation (1), a typical GCN can be easily constructed with predefined number of layers and the feature dimensions at each layer.

### 2.2.2 Graph AutoEncoders

Graph AutoEncoders(GAEs) are unsupervised learning frameworks that usually consist of a GCN encoder and a simple inner product decoder (Kipf and Welling, 2016a,b). Let  $Z = \text{GCN}(X, A)$  denote the final latent representation obtained from a GCN, the core idea of GAEs is to approximate the original adjacency matrix  $A$  with the reconstructed matrix  $\sigma(ZZ^T)$  with  $\sigma(\cdot)$  being the sigmoid activation function. However, different from general semi-supervised learning scenarios, where a known graph structure is usually given (e.g. Cora, Citeseer, etc.), we do not have such prior knowledge for cancer subtyping or many other clustering tasks. As a result, the graph structure information used in GAEs needs to be constructed based on the feature matrix, which might be sub-optimal due to the existence of the noises in these datasets. In addition, since the input adjacency matrix is not updated during the whole training process, it would further impair the learning ability of GAEs. To solve these issues, here we propose to reconstruct the input  $X$  instead of the adjacency matrix  $A$  by minimizing the squared reconstruction loss (Wang et al., 2017). Specifically, the single-layer autoencoder in our model is defined as:

$$\|X - f(X, A; W)\|_F^2, \quad (2)$$

where  $f(X, A; W)$  represents a GCN parameterized by the weight matrix  $W$ . By using the linear activation function and adding a regularization term on  $W$ , Equation (2) can be further transformed into:

$$\|X - \tilde{A}XW\|_F^2 + \lambda \|W\|_F^2, \quad (3)$$

where  $\lambda$  is a tradeoff parameter. Based on Equation (3), our model can be easily extended to a multi-layer GAE by stacking a set of single-layer autoencoders and thus forming a deep learning architecture (Salha et al., 2019). Suppose our model has  $L$  layers, then the latent representation  $Z^{l+1}$  ( $l = 1, 2, \dots, L-1$ ) can be obtained by:

$$Z^{l+1} = \tilde{A}Z^l W^l \quad (4)$$

with  $Z^0 = X$ .

### 2.2.3 Optimization

It is clear from Equations (3) and (4) that to train the proposed GAE, we only need to optimize the weight matrix  $W$  at each layer. Unlike traditional deep learning methods that require gradient descent to reach convergence, we can easily get a global optimal solution for  $W$  layerwise due to the convexity of Equation (3) with respect to  $W$ . Specifically, by taking the derivative of Equation (3) with  $W$  and setting it to 0, we obtain that:

$$W = X^T \tilde{A}^T X (X^T \tilde{A}^T \tilde{A} X + \lambda)^{-1}. \quad (5)$$

With the obtained optimal solution of  $W$ , we can directly calculate the new representation  $Z^l$  at each layer according to Equation (4).

## 2.3 Similarity graph construction and its optimization

### 2.3.1 Similarity graph construction

Let  $X^1, X^2, \dots, X^m$  denote the feature matrix for each omic.  $X^v \in \mathbb{R}^{n \times d_v}$  ( $v = 1, 2, \dots, m$ ), where  $n$  and  $d_v$  represent the number of samples and the number of features of the  $v$ th view, respectively. According to the proposed GAE in Equation (4), we can obtain a

latent representation  $Z^v$  for each omic data type and thus calculate a set of similarity matrices  $A^v \in \mathbb{R}^{n \times n}$  by minimizing the following objective function:

$$\min_{\{A^v\}} \sum_{v=1}^m \sum_{i,j=1}^n \|z_i^v - z_j^v\|_2^2 a_{ij}^v + \beta \sum_{v=1}^m \sum_{i,j=1}^n \|a_{ij}^v\|_2^2, \quad (6)$$

$$s.t. \forall v, a_{ii}^v = 0, a_{ij}^v \geq 0, \mathbf{1}^T a_i^v = 1$$

where  $z_i^v$  denotes the  $i$ th row vector of  $Z^v$  and  $a_{ij}^v$  denotes the  $(i, j)$ th element of  $A^v$ .  $\mathbf{1}$  is a column vector with all its elements equal to 1. The first term in Equation (6) means that a smaller distance between  $z_i^v$  and  $z_j^v$  should be assigned a larger connection probability (Nie et al., 2014). The second term is a regularization that avoids trivial solutions.  $\beta$  is a tradeoff parameter balancing the two terms and can be determined adaptively by the number of neighbors  $k$ . Nevertheless, each  $A^v$  in Equation (6) is optimized independently and cannot interact with each other to share the common information among them. Therefore, we add a consensus graph learning term to guide the learning of  $A^v$  (Wang et al., 2020a,b):

$$\min_{\{A^v\}, S} \sum_{v=1}^m \sum_{i,j=1}^n \|z_i^v - z_j^v\|_2^2 a_{ij}^v + \beta \sum_{v=1}^m \sum_{i,j=1}^n \|a_{ij}^v\|_2^2 + \sum_{v=1}^m \omega_v \|S - A^v\|_F^2, \quad (7)$$

$$s.t. \forall v, a_{ii}^v = 0, a_{ij}^v \geq 0, \mathbf{1}^T a_i^v = 1, s_{ij} \geq 0, \mathbf{1}^T s_i = 1$$

where  $\omega_v$  is the weight measuring the difference between the consensus matrix  $S$  and the  $v$ th view and it can be updated automatically. As we can see from Equation (7), with the guidance of the consensus matrix  $S$ , each  $A^v$  will be forced to approach the same graph structure and thus the underlying consistency among multiple views can be exploited.

### 2.3.2 Optimization

There are three variables  $A^v$ ,  $S$  and  $\omega_v$  that need to be updated and we adopt alternative optimization to solve them effectively.

**Update  $A^v$ .** Once we obtained the latent node features  $Z^v$  from GAEs, we can calculate a similarity matrix  $A^v$  for each omic. Actually,  $A^v$  of different views can be updated independently (Cui et al., 2020). Therefore, we solve for each  $a_{ij}^v$  separately and transform Equation (7) as follows:

$$\min_{\{A^v\}} \sum_{i=1}^n \|z_i^v - z_j^v\|_2^2 a_{ij}^v + \beta \sum_{j=1}^n \|a_{ij}^v\|_2^2 + \omega_v \|s_i - a_i^v\|_2^2. \quad (8)$$

$$s.t. \forall v, a_{ii}^v = 0, a_{ij}^v \geq 0, \mathbf{1}^T a_i^v = 1$$

Let  $e_{ij} = \|z_i^v - z_j^v\|_2^2$  and  $e_i$  be a vector with its  $j$ th element as  $e_{ij}$ , Equation (8) can be further written in a simple form:

$$\min \|a_i^v + \frac{e_i - 2\omega_v s_i}{2(\beta + \omega_v)}\|_2^2, s.t. a_{ii}^v = 0, a_{ij}^v \geq 0, \mathbf{1}^T a_i^v = 1. \quad (9)$$

Equation (9) can be solved efficiently via the method proposed in (Huang et al., 2015).

**Update  $S$ .** When  $A^v$  ( $v = 1, 2, \dots, m$ ) is fixed, Equation (7) becomes:

$$\min_S \sum_{i=1}^n \sum_{v=1}^m \omega_v \|s_i - a_i^v\|_2^2, s.t. s_{ii} = 0, s_i \geq 0, \mathbf{1}^T s_i = 1 \quad (10)$$

and it can be solved in the way as Equation (9).

**Update  $\omega_v$ .** Finally, we update  $\omega_v$  with the following formula:

$$\omega_v = 1/2 \sqrt{\|S - A^v\|_F^2}, v = 1, 2, \dots, m. \quad (11)$$

Obviously,  $\omega_v$  will be assigned larger values when the corresponding view-specific similarity matrix is more consistent with the final consensus graph and vice versa.

## 2.4 Combination of the two components and clustering

With the two stages introduced above, we combine them together to reinforce the learning of each stage in an iterative manner.

**Algorithm 1.** Consensus Guided Graph Autoencoders (CGGA)

**Input:** Multi-omics datasets  $\{X^v\}$  ( $v = 1, 2, \dots, m$ ), parameter  $\lambda$ , number of neighbors  $k$ , number of layers  $L$  in GAEs;  
**Output:** Final clustering results;  
1. Initialize each  $A^v$  with  $X^v$  ( $v = 1, 2, \dots, m$ ) using KNN;  
2. Repeat:  
3.   for  $v = 1, 2, \dots, m$ :  
4.    Initialize  $(Z^v)^0 = X^v$ ;  
5.    for  $l = 1, 2, \dots, L$ :  
6.     Update  $(W^v)^{l-1}$  according to Equation (5);  
7.     Calculate  $(Z^v)^l$  according to Equation (4);  
8.    end  
9.   Obtain the final latent representation  $Z^v$ .  
10. end  
11. Initialize  $\omega_v = 1/m$ , initialize each  $A^v$  with  $Z^v$  using KNN, initialize  $S$  by averaging  $\{A^v\}$  with  $\omega_v$ ;  
12. Repeat  
13.   Update  $A^v$  according to Equation (9).  
14.   Update  $S$  according to Equation (10);  
15.   Calculate  $\omega_v$  according to Equation (11);  
16.   until Convergence;  
17. until Convergence;  
18. Apply spectral clustering on  $S$ .

Specifically, in the first step, we can obtain new representations  $Z^v$  for all omics through the proposed GAEs in Equation (4); in the second step, we learn  $m$  specific similarity graphs  $A^v$  as well as a consensus similarity graph  $S$  through Equation (9) and Equation (10), respectively. The learned  $A^v$  is then fed back into the corresponding GAE to guide the learning of  $Z^v$ . In this way, the consensus information shared by different views can be conveyed to learn the new representations effectively. By repeatedly optimizing the variables  $\{Z^v, A^v\}$  and  $S$ , we can finally obtain more robust GAEs for representation learning and a more reliable similarity graph for subtype identification. After we obtain the final similarity matrix  $S$ , we use rotation cost method to evaluate the number of clusters and then apply spectral clustering on  $S$  to get the patient clusters. The whole optimization process is summarized in Algorithm 1.

## 3 Results

### 3.1 Benchmark datasets

To comprehensively evaluate the performance of our method, we selected two types of datasets in the following experiments, i.e. four frequently used machine learning datasets and four cancer datasets. A brief description of the datasets are given below:

**Generic machine learning datasets.** We used four generic datasets in this work, i.e. Caltech101-7, BBC, COIL20, Handwritten. Specifically, Caltech101-7 has 1474 images that are selected from 7 widely used classes (Fei-Fei et al., 2007). COIL20 is from the Columbia object image library and it has 1440 images from 20 categories (Nene et al., 1996). BBC dataset is collected from the BBC news website. It contains 685 documents involving 5 topical labels (Greene and Cunningham, 2006). Handwritten dataset has 10 classes and each class contains 200 different handwritten digits (Dua

**Table 2.** Summary of the cancer datasets

| Datasets | No. of views | No. of samples | No. of features     |
|----------|--------------|----------------|---------------------|
| AML      | 3            | 170            | 20531 + 5000 + 705  |
| Breast   | 3            | 621            | 20531 + 5000 + 1046 |
| GBM      | 3            | 274            | 12042 + 5000 + 534  |
| Liver    | 3            | 367            | 20531 + 5000 + 1046 |

and Graff, 2019). The statistics of the four datasets are summarized in Table 1.

**Cancer datasets.** The four cancer datasets, Acute Myeloid Leukemia (AML), Breast Invasive Carcinoma (Breast), Glioblastoma Multiforme (GBM) and Liver Hepatocellular Carcinoma (Liver), were directly downloaded from (Rappoport and Shamir, 2018). All of the four datasets contain three omic data types, i.e. mRNA expression, DNA methylation and miRNA expression. Notably, different from the generic datasets above, the true number of clusters within each cancer dataset is unknown. A brief summary of the cancer datasets is listed in Table 2.

### 3.2 Experimental settings

**Baseline methods.** Seven algorithms, spectral clustering, Cotrain (Kumar and Iii, 2011), CoregSC (Kumar et al., 2011), LRACluster (Wu et al., 2015), PINS (Nguyen et al., 2017), SNF (Wang et al., 2014) and iClusterBayes (Mo et al., 2018) are selected as baselines to compare with the proposed method. Among these methods, spectral clustering is a representative method for single-view clustering tasks. Cotrain and CoregSC are designed for general-purpose multi-view clustering problems, while LRACluster, PINS, SNF and iClusterBayes are mainly developed for integration of multi-omics data and disease subtyping.

**Parameter settings.** For spectral clustering, we simply concatenate the multi-view features into a unified feature vector. For the other methods, we carefully tune the parameters to record their best results. Each method is repeated five times and the average result is reported. For our method, there are in total four parameters, i.e.  $\lambda$ ,  $\beta$ , the number of neighbors  $k$  and the number of layers  $L$  in graph autoencoder. Once  $k$  is fixed, the optimal value of  $\beta$  can be determined adaptively (Wang et al., 2020a,b). For the number of layers, we set  $L = 2$  throughout the experiments according to the analysis results shown in the experiment section.

**Data preprocessing.** For cancer datasets, features measured by RNA-seq and miRNA-seq were log transformed, and miRNA features with zero variance were filtered. Specifically, for SNF, Cotrain, CoregSC and our method, all features were further normalized to have zero mean and standard deviation. Moreover, 2000 features with highest variance were selected from all omics to run Cotrain, CoregSC and CGGA. For generic machine learning datasets, features from all views were normalized to have unit norm before running all algorithms.

**Estimation of the number of clusters  $c$ .** For generic datasets, the number of clusters in each dataset is given. For cancer datasets, we estimate  $c$  with different approaches for each method. Specifically, for spectral clustering, LRACluster, PINS, SNF and iClusterBayes, the optimal  $c$  was determined in the same way as shown in (Rappoport and Shamir, 2018). For Cotrain and CoregSC, since they are all spectral clustering based multi-view learning methods, we used the same number of clusters estimated by SNF for the two methods. For our method, we use the rotation cost to estimate  $c$  as it

**Table 1.** Summary of the generic machine learning datasets

| Datasets     | No. of views | No. of samples | No. of clusters | No. of features                  |
|--------------|--------------|----------------|-----------------|----------------------------------|
| Caltech101-7 | 6            | 1474           | 7               | 48 + 40 + 254 + 1984 + 512 + 928 |
| BBC          | 4            | 685            | 5               | 4659 + 4633 + 4665 + 4684        |
| COIL20       | 3            | 1440           | 20              | 512 + 1239 + 324                 |
| Handwritten  | 6            | 2000           | 10              | 240 + 76 + 216 + 47 + 64 + 6     |

**Table 3.** Comparison of the clustering performance on the four generic datasets in terms of ACC

| Methods       | Caltech101-7   | BBC            | COIL20         | Handwritten    |
|---------------|----------------|----------------|----------------|----------------|
| Spectral      | 0.6208 ± 0.000 | 0.5241 ± 0.000 | 0.6806 ± 0.000 | 0.6620 ± 0.000 |
| LRCluster     | 0.4233 ± 0.000 | 0.4847 ± 0.000 | 0.6049 ± 0.005 | 0.4470 ± 0.001 |
| PINS          | 0.5522 ± 0.000 | 0.4015 ± 0.000 | 0.6444 ± 0.012 | 0.4690 ± 0.000 |
| SNF           | 0.5197 ± 0.000 | 0.5752 ± 0.000 | 0.7868 ± 0.000 | 0.8225 ± 0.000 |
| iClusterBayes | 0.1913 ± 0.005 | 0.3810 ± 0.040 | 0.2632 ± 0.030 | 0.1325 ± 0.020 |
| Cotrain       | 0.4783 ± 0.060 | 0.6375 ± 0.021 | 0.7796 ± 0.035 | 0.7763 ± 0.053 |
| CoregSC       | 0.4166 ± 0.050 | 0.4672 ± 0.016 | 0.6771 ± 0.039 | 0.7540 ± 0.061 |
| CGGA          | 0.7741 ± 0.000 | 0.6934 ± 0.000 | 0.8271 ± 0.000 | 0.8585 ± 0.000 |

**Table 4.** Comparison of the clustering performance on the four cancer datasets in terms of the empirical survival *P*-values

| Methods       | AML           | Breast        | GBM            | Liver         |
|---------------|---------------|---------------|----------------|---------------|
| Spectral      | 0.0186 ± 0.00 | 0.0276 ± 0.00 | 5.7E-03 ± 0.00 | 0.3919 ± 0.00 |
| LRCluster     | 0.0107 ± 0.00 | 0.0452 ± 0.00 | 0.0363 ± 0.01  | 0.1625 ± 0.01 |
| PINS          | 0.0706 ± 0.00 | 0.0500 ± 0.00 | 2.3E-04 ± 0.00 | 0.0111 ± 0.00 |
| SNF           | 0.0014 ± 0.00 | 0.0989 ± 0.00 | 7.3E-05 ± 0.00 | 0.6592 ± 0.00 |
| iClusterBayes | 0.1054 ± 0.01 | 0.6272 ± 0.01 | 0.0938 ± 0.00  | 0.1056 ± 0.00 |
| Cotrain       | 0.0015 ± 0.01 | 0.0557 ± 0.00 | 0.0114 ± 0.00  | 0.0524 ± 0.00 |
| CoregSC       | 0.3350 ± 0.01 | 0.0568 ± 0.00 | 0.1896 ± 0.01  | 0.4028 ± 0.00 |
| CGGA          | 0.0009 ± 0.00 | 0.0149 ± 0.00 | 2.1E-04 ± 0.00 | 0.0050 ± 0.00 |

is known to be more stable (Wang *et al.*, 2014). The main idea of rotation cost is to exploit the structure of eigen-vectors of the Laplacian matrix and more details can be referred to (Zelnik-Manor and Perona, 2004).

### 3.3 Experimental results

**Performance evaluation.** We first compared the clustering performance of CGGA with the seven baseline methods on the four general-purpose multi-view datasets. Table 3 reports the comparison results in terms of ACC. Results on other evaluation metrics (i.e. NMI and purity) can be found in Supplementary Tables S1 and S2, Supplementary File S1. The experimental results clearly demonstrated the superiority of our method over the other methods. Specifically, our method gained more than 10% improvement on ACC and NMI than the second best method on Caltech101-7 and BBC datasets, respectively.

Next, we compared the performance of each method on cancer datasets. The number of distinct subtypes identified by each method was provided in Supplementary Table S3. Since there does not exist explicit subtypes for most cancer datasets, we cannot evaluate the quality of clusters with commonly used metrics such as ACC. Instead, we seek for metrics that can evaluate the potential clinical significance of the obtained clusters. The logrank test is a statistical test used to compare the survival times between two or more independent groups and it is commonly assumed that if groups of patients have significantly different survival, they are different in a biologically meaningful way. Therefore, we first evaluate the differential survival between the obtained clusters with logrank test. Specifically, to derive a more accurate *P*-value for comparison, we adopted the same strategy used in (Rappoport and Shamir, 2018), where they permuted the cluster labels between samples and used the test statistic to obtain an empirical *P*-value. Table 4 lists the comparison results of all methods on the four cancer datasets. As a result, our method achieved the most significant *P*-values on AML, Breast and Liver datasets, and obtained the second best result on GBM. Moreover, we also compared the number of enriched clinical labels in the obtained clusters by each method. Six clinical labels, gender, age at initial pathologic diagnosis, pathologic T, pathologic M, pathologic N and pathologic stage, were selected for the enrichment test. Notably, different cancer subtypes have different clinical parameters and the details for each cancer subtype were given in

Supplementary Table S4. As shown in Table 5, our method obtained the greatest number of enriched clinical labels over all cancer datasets. In particular, we obtained 5 enriched clinical labels on Breast dataset, which is the most among all methods. Taken together, these results demonstrated that our method can perform well on both generic machine learning datasets and cancer datasets.

**Comparisons between single view and multi-view data.** To validate whether our method can take advantage of the multi-view datasets and identify the underlying intrinsic clustering structures, we tested the clustering performance of our method by using data from specific views instead of all views. Two datasets AML and Caltech101-7 were selected for validation. Specifically, since AML only contains three views, we tested all cases of different view combinations. For Caltech101-7, we only tested the performance of using data from each view as it contains six views. As expected (Fig. 2), our method achieved the best performance on both datasets when data from all views is considered.

**Effects of the number of layers in GAEs.** We also tested the influences of the number of layers stacked in GAEs on the clustering performance. Figure 3 illustrated the performance variations on the four cancer datasets as well as Caltech101-7 with respect to the number of layers. We can see that the performance on AML and Caltech101-7 is relatively stable as the number of layers increases, while on Breast, GBM and Liver datasets, the performance reduces sharply when the number of layers increases to 7 or 8. This might be due to the difficulties to train a more complex network architecture

**Table 5.** The number of enriched clinical labels obtained by each method

| Methods       | AML | Breast | GBM | Liver |
|---------------|-----|--------|-----|-------|
| Spectral      | 1   | 2      | 2   | 2     |
| LRCluster     | 1   | 4      | 1   | 0     |
| PINS          | 1   | 4      | 1   | 2     |
| SNF           | 1   | 2      | 1   | 2     |
| iClusterBayes | 0   | 3      | 0   | 2     |
| Cotrain       | 1   | 1      | 0   | 2     |
| CoregSC       | 1   | 1      | 0   | 2     |
| CGGA          | 1   | 5      | 2   | 3     |

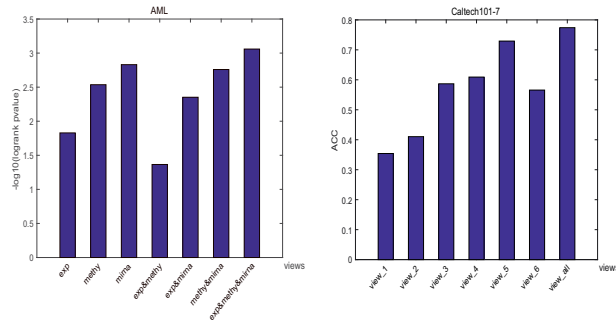

Fig. 2. Clustering performances of CGGA using data from specific views instead of all views

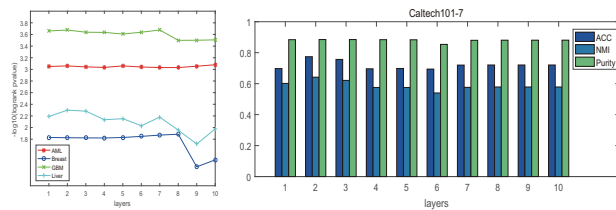

Fig. 3. Effects of the number of layers on the clustering performance

and higher risks of information loss. In summary, we only use two layers in our model as it is enough to obtain satisfactory results.

**Parameter analysis.** There are two hyper-parameters  $\lambda$  and  $\beta$  in our objective function, where  $\beta$  can be adaptively determined by the number of neighbors  $k$ . Therefore, we investigated their impacts on the clustering performance of the proposed method on two datasets, AML and Caltech101-7 (Fig. 4). The analysis results on other datasets were provided in Supplementary Figure S1–S6. It can be observed that, the proposed method is relatively stable with respect to the two parameters on the generic machine learning datasets. For cancer datasets, the optimal values for the two parameters are dependent on the specific dataset. In general,  $\lambda$  can be set in the range [0.01, 10] while  $k$  can be selected from {7, 9}.

**Convergence analysis.** Since our method mainly consists of two components, we first investigated the convergence of each sub-optimization problem separately. Specifically, in the first step, we can obtain the closed-form optimal solution for  $W$  according to Equation (5). In the second step, the optimization for  $A^v$  is guaranteed to converge to an optimal solution as the Hessian matrix of the Lagrange function of Equation (9) is positive definite. Similarly, we can derive the same conclusion for the optimization of  $S$ . Therefore, our algorithm can converge to an optimal solution at each iteration. Unfortunately, since the input similarity matrix  $A^v$  varies at each iteration, it is difficult to theoretically prove the overall convergence of the proposed algorithm. However, in practice, we find that our algorithm can quickly reach a stable state in practice in most cases (Fig. 5, Supplementary Figs S7–S12), which ensures the utility of our method.

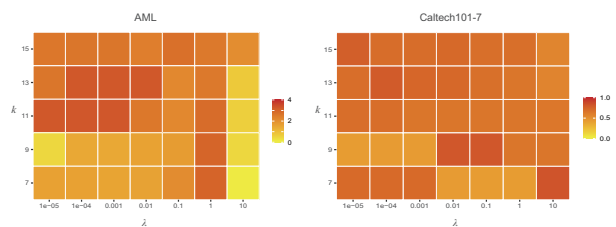

Fig. 4. Impacts of  $\lambda$  and  $k$  on the clustering performance of CGGA on AML and Caltech101-7 datasets

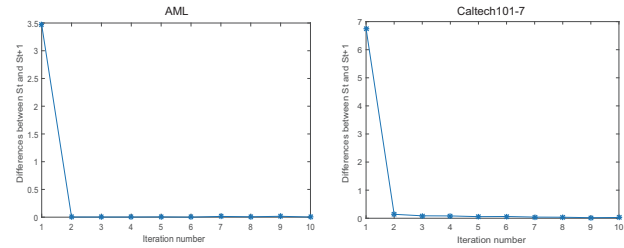

Fig. 5. Convergence analysis of CGGA on Caltech101-7 and AML datasets. The vertical axis represents the differences between the consensus matrices  $S_t$  and  $S_{t+1}$ , where  $t$  is the number of overall iterations

### 3.4 Comparison of clusters to established subtypes

In this subsection, we investigated the connections between the clustering results identified by our method with previously established subtypes for GBM dataset. Specifically, Brennan *et al.* identified four major subtypes, i.e. Classical, Mesenchymal, Neural, Proneural, based on the gene expression profiles, where they further divided the Proneural subtype into proneural G-CIMP and proneural-non-G-CIMP subtypes in terms of the DNA methylation profiles (Brennan *et al.*, 2013). We therefore reported the overall number of samples of Proneural subtype by taking the G-CIMP into account. After filtering, we retained 271 common samples with reported subtype information and the comparison results were listed in Table 6. We can observe that Subtype 1 is enriched for the Classical subtype while Subtype 2 is mainly dominated by the Proneural subtype. Subtype 3 contains samples belonging to the Mesenchymal subtype and the Neural subtype. Similar conclusions were also drawn from a smaller sample collection (Verhaak *et al.*, 2010) (Supplementary File S1, Supplementary Table S5). Our findings indicated that patients of the Neural subtype have similar molecular traits with Mesenchymal and Classical subtypes and might be clustered together for better treatment.

### 3.5 Clinical implications of the identified clusters

With the identified subtypes for cancer samples, we can carry out further analysis to discover the underlying differences between cancer subtypes and thus facilitate clinical therapeutics. To this end, we examined the responses of patients from different GBM subtypes to the same treatment. Specifically, the drug treatment information for GBM patients were downloaded from TCGA. After filtering, there were in total 272 samples with matched treatment data. Among these, 87 were treated with Temozolomide, an anti-cancer chemotherapy drug that is frequently used to treat brain tumors (Table 7). We then tested for each identified subgroup the survival time of patients treated versus those not treated with the drug by using R package survminer and reported the  $P$ -value of the logrank test (Fig. 6). Notably, among the three subtype groups, only patients from subtype 1 had positive responses to the drug treatment with

Table 6. Comparison of GBM subtypes identified by CGGA to gene expression subtypes reported by Brennan *et al.*

|                | Classical | Mesenchymal | Neural | Proneural |
|----------------|-----------|-------------|--------|-----------|
| No of Subtype1 | 56        | 11          | 15     | 3         |
| No of Subtype2 | 2         | 3           | 6      | 62        |
| No of Subtype3 | 12        | 69          | 25     | 7         |

Table 7. The number of samples with drug treatment in each subtype

| No. of samples | Subtype 1 | Subtype 2 | Subtype 3 | Total |
|----------------|-----------|-----------|-----------|-------|
| Treated        | 23        | 19        | 45        | 87    |
| Untreated      | 62        | 53        | 70        | 185   |

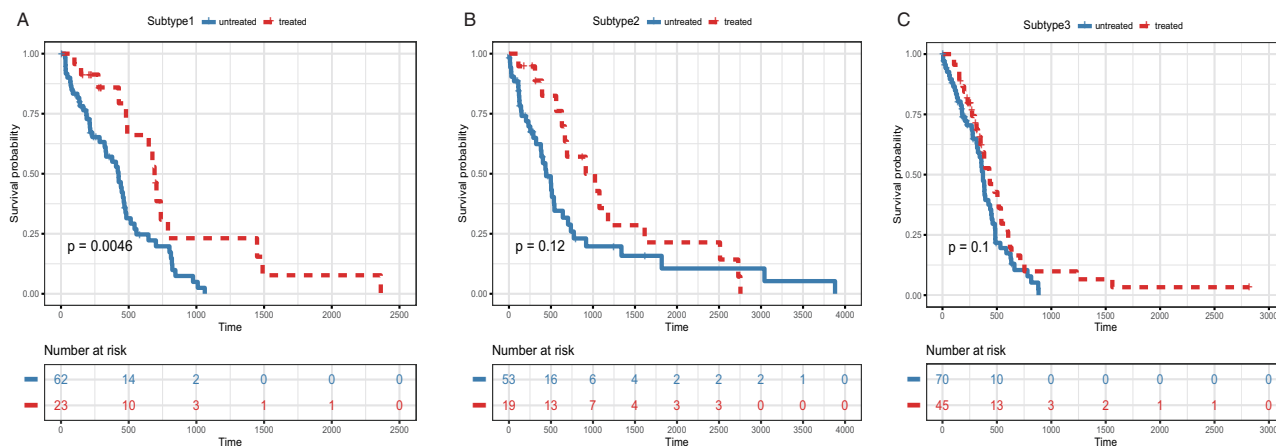

Fig. 6. Kaplan-Meier survival analysis within each identified subtype group for GBM. Red line and blue line represent treated and untreated patients with the drug Temozolomide, respectively

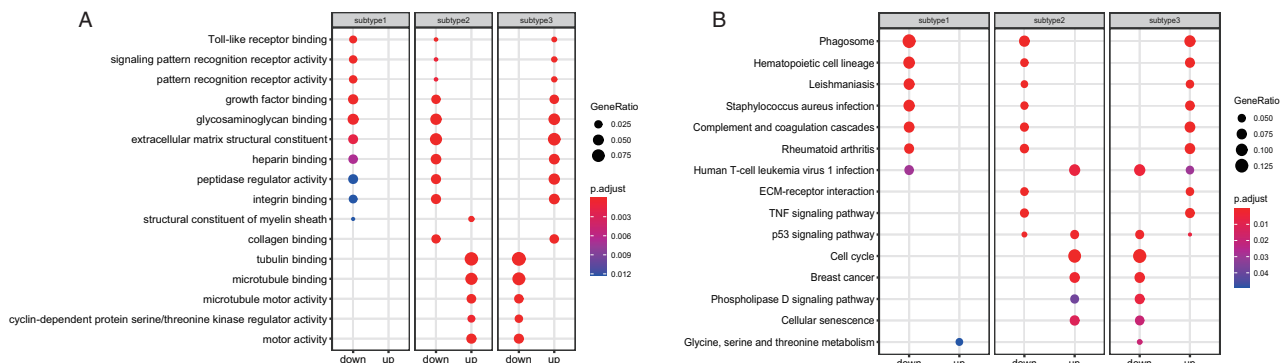

Fig. 7. Enrichment analysis of the differentially expressed genes identified between subtypes: (A) GO functional enrichment analysis. (B) KEGG pathways over-representation analysis. Genes are divided into down-/up-regulated groups according to their fold change between different subtypes

significantly increased survival time, while for the other groups there were no significant differences detected in survival time. These results indicated that different subtypes may respond differently to certain pharmacotherapies.

To gain further insights into the characteristics of each subtype, we identified a set of differentially expressed genes (adjusted  $P$ -value  $< 0.01$ ) associated with each subgroup using R package limma (Ritchie et al., 2015). The identified genes were then divided into down-regulated and up-regulated genes according to their fold changes and were used for the subsequent functional enrichment analysis using R package clusterProfiler (Yu et al., 2012). Figure 7 demonstrated the over-representation analysis for both GO terms and KEGG pathways. Interestingly, we found that although the enriched GO categories as well as the KEGG pathways with respect to subtype 2 and subtype 3 were similar, their associated genes exhibited opposite expression profiles. This might explain why samples of subtype 2 and subtype 3 had different responses with the same treatment.

### 4 Conclusions

To accurately identify cancer subtypes and facilitate precision cancer diagnosis, it is imperative to take an integrative approach that combines multi-omics data to uncover the consensus information hidden in these data. In this article, we proposed a consensus guided graph autoencoder to cluster cancer patients into biologically meaningful groups. Our method effectively learns a latent representation for each omic by graph autoencoders and then obtained a consensus similarity matrix based on the new features. Moreover, an omic-

specific similarity matrix was also learned together with the consensus matrix and was further used to conduct the training process of graph autoencoders. As a result, the latent representation learning and consensus matrix learning could be enhanced with each other in an iterative manner. Extensive experimental results on both machine learning datasets and cancer datasets confirmed the superiority of our method over existing baselines. We also analyzed the clinical implications of the obtained subgroups for GBM. Specifically, the GO and KEGG enrichment analysis on the differentially expressed genes associated with each subtype exhibited distinct expression profiles, which further confirmed the importance of cancer subtype identification in cancer treatment. Taken together, we provided a new avenue to identify cancer subtypes via consensus guided graph autoencoders.

The superior performance of our method can be attributed to the following two reasons. First, we utilized GAEs to obtain robust latent representations for each omic, where both the feature information and graph structure information of samples were incorporated into a unified learning framework. Second, we proposed an effective two-step strategy to share the consistency among multiple omics and enhance the representation learning by iteratively updating the input similarity matrices for GAEs. Although effective, there also exist some limitations in our model that need further investigation. For example, two parameters are involved in our objective function and should be carefully tuned during the experiments to reach optimal solutions. Besides, the incorporation of multi-omics datasets does not necessarily lead to better clustering results in certain occasions and thus it remains challenging to uncover both the consistent and complementary information hidden in each type of multi-omics data.

## Acknowledgements

The authors thank anonymous reviewers for their valuable suggestions.

## Funding

This work was supported by the National Natural Science Foundation of China [61873089, 61772313, U1836216] and the Major Fundamental Research Project of Shandong Province [ZR2019ZD03].

*Conflict of Interest:* none declared.

## References

- Brennan, C.W. et al.; TCGA Research Network. (2013) The somatic genomic landscape of glioblastoma. *Cell*, **155**, 462–477.
- Cai, M.L. and Li, L.M. (2017) Subtype identification from heterogeneous TCGA datasets on a genomic scale by multi-view clustering with enhanced consensus. *BMC Med. Genomics*, **10**, 75.
- Cancer Genome Atlas Research Network. et al. (2013) The Cancer Genome Atlas Pan-Cancer analysis project. *Nat. Genet.*, **45**, 1113–1120.
- Chen, F. et al. (2019) Pan-cancer molecular subtypes revealed by mass-spectrometry-based proteomic characterization of more than 500 human cancers. *Nat. Commun.*, **10**, 5679.
- Cui, H. et al. (2020) Scalable deep hashing for large-scale social image retrieval. *IEEE Trans. Image Process.*, **29**, 1271–1284.
- Dai, X. et al. (2015) Breast cancer intrinsic subtype classification, clinical use and future trends. *Am. J. Cancer Res.*, **5**, 2929–2943.
- Dua, D. and Graff, C. (2019) UCI machine learning repository. In: <http://archive.ics.uci.edu/ml>. University of California, School of Information and Computer Science, Irvine, CA.
- Fei-Fei, L. et al. (2007) Learning generative visual models from few training examples: an incremental Bayesian approach tested on 101 object categories. *Comput. Vis. Image Understand.*, **106**, 59–70.
- Greene, D. and Cunningham, P. (2006) Practical solutions to the problem of diagonal dominance in kernel document clustering. In: *Proceedings of the 23rd International Conference on Machine Learning*, Association for Computing Machinery, Pittsburgh, Pennsylvania, USA, pp. 377–384.
- Huang, C. et al. (2019) Development and validation of radiomic signatures of head and neck squamous cell carcinoma molecular features and subtypes. *EBioMedicine*, **45**, 70–80.
- Huang, J. et al. (2015) A new simplex sparse learning model to measure data similarity for clustering. In: *The Twenty-Fourth International Conference on Artificial Intelligence*. Buenos Aires, Argentina; pp. 3569–3575.
- Janku, F. (2014) Tumor heterogeneity in the clinic: is it a real problem? *Theor. Adv. Med. Oncol.*, **6**, 43–51.
- Jiang, B. et al. (2019a) Multiple graph adversarial learning. *arXiv:1901.07439*.
- Jiang, L. et al. (2019b) Discovering cancer subtypes via an accurate fusion strategy on multiple profile data. *Front. Genet.*, **10**, 20.
- Kipf, T.N. and Welling, M. (2016a) Semi-supervised classification with graph convolutional networks. *arXiv:1609.02907*.
- Kipf, T.N. and Welling, M. (2016b) Variational graph auto-encoders. *arXiv:1611.07308*.
- Kuijjer, M.L. et al. (2018) Cancer subtype identification using somatic mutation data. *Br. J. Cancer*, **118**, 1492–1501.
- Kumar, A. and Iii, H.D. (2011) A co-training approach for multi-view spectral clustering. In: *Proceedings of the 28th International Conference on International Conference on Machine Learning*. Omnipress, Bellevue, Washington, USA, pp. 393–400.
- Kumar, A. et al. (2011) Co-regularized multi-view spectral clustering. In: *Proceedings of the 24th International Conference on Neural Information Processing Systems*. Curran Associates Inc., Granada, Spain, pp. 1413–1421.
- Li, Y.F. et al. (2018) A review on machine learning principles for multi-view biological data integration. *Brief. Bioinform.*, **19**, 325–340.
- Mo, Q.X. et al. (2018) A fully Bayesian latent variable model for integrative clustering analysis of multi-type omics data. *Biostatistics*, **19**, 71–86.
- Nene, S.A. et al. (1996) Columbia object image library (COIL-20). *Technical report CUCS-005-96*, Columbia University.
- Nguyen, N.D. and Wang, D.F. (2020) Multiview learning for understanding functional multiomics. *PLoS Comput. Biol.*, **16**, e1007677.
- Nguyen, T. et al. (2017) A novel approach for data integration and disease subtyping. *Genome Res.*, **27**, 2025–2039.
- Nie, F. et al. (2014) Clustering and projected clustering with adaptive neighbors. In: *Proceedings of the 20th ACM SIGKDD International Conference on Knowledge Discovery and Data Mining*. Association for Computing Machinery, New York, USA, pp. 977–986.
- Nie, F.P. et al. (2018) Multiview clustering via adaptively weighted procrustes. In: *Kdd'18: Proceedings of the 24th ACM SIGKDD International Conference on Knowledge Discovery & Data Mining, London, United Kingdom*, pp. 2022–2030.
- O'Connell, M.J. and Lock, E.F. (2016) R.JIVE for exploration of multi-source molecular data. *Bioinformatics*, **32**, 2877–2879.
- Rappoport, N. and Shamir, R. (2018) Multi-omic and multi-view clustering algorithms: review and cancer benchmark. *Nucleic Acids Res.*, **46**, 10546–10562.
- Ritchie, M.E. et al. (2015) limma powers differential expression analyses for RNA-sequencing and microarray studies. *Nucleic Acids Res.*, **43**, e47.
- Salha, G. et al. (2019) Keep it simple: graph autoencoders without graph convolutional networks. *arXiv:1910.00942*.
- Salvadores, M. et al. (2020) Matching cell lines with cancer type and subtype of origin via mutational, epigenomic, and transcriptomic patterns. *Sci. Adv.*, **6**, eaba1862.
- Shen, R.L. et al. (2009) Integrative clustering of multiple genomic data types using a joint latent variable model with application to breast and lung cancer subtype analysis. *Bioinformatics*, **25**, 2906–2912.
- Speicher, N.K. and Pfeifer, N. (2015) Integrating different data types by regularized unsupervised multiple kernel learning with application to cancer subtype discovery. *Bioinformatics*, **31**, i268–275.
- Tang, C. et al. (2019) Learning a joint affinity graph for multiview subspace clustering. *IEEE Trans. Multimedia*, **21**, 1724–1736.
- Tepeli, Y.I. et al. (2020) PAMOGK: a Pathway Graph Kernel based Multi-Omics Approach for Patient Clustering. *Bioinformatics*, **36**, 5237–5246.
- Vaske, C.J. et al. (2010) Inference of patient-specific pathway activities from multi-dimensional cancer genomics data using PARADIGM. *Bioinformatics*, **26**, i237–i245.
- Verhaak, R.G. et al.; Cancer Genome Atlas Research Network. (2010) Integrated genomic analysis identifies clinically relevant subtypes of glioblastoma characterized by abnormalities in PDGFRA, IDH1, EGFR, and NF1. *Cancer Cell*, **17**, 98–110.
- Wang, B. et al. (2014) Similarity network fusion for aggregating data types on a genomic scale. *Nat. Methods*, **11**, 333–U319.
- Wang, C. et al. (2017) MGAE: marginalized graph autoencoder for graph clustering. In: *Proceedings of the 2017 ACM on Conference on Information and Knowledge Management*. Association for Computing Machinery, Singapore, pp. 889–898.
- Wang, H. et al. (2020a) GMC: graph-based multi-view clustering. *IEEE Trans. Knowl. Data Eng.*, **32**, 1116–1129.
- Wang, Q. et al. (2020b) Detecting coherent groups in crowd scenes by multi-view clustering. *IEEE Trans. Pattern Anal. Mach. Intell.*, **42**, 46–58.
- Wu, D.M. et al. (2015) Fast dimension reduction and integrative clustering of multi-omics data using low-rank approximation: application to cancer molecular classification. *BMC Genomics*, **16**, 1022.
- Wu, F. et al. (2019) Simplifying graph convolutional networks. In: *Proceedings of the 36th International Conference on Machine Learning*. Long Beach, California, USA, pp. 6861–6871.
- Xu, A. et al. (2019) Simultaneous interrogation of cancer omics to identify subtypes with significant clinical differences. *Front. Genet.*, **10**, 236.
- Xu, J. et al. (2016) Discriminatively embedded K-means for multi-view clustering. In: *Proceedings of the IEEE Conference on Computer Vision and Pattern Recognition*. Las Vegas, NV, USA, pp. 5356–5364.
- Yang, Z. and Michailidis, G. (2016) A non-negative matrix factorization method for detecting modules in heterogeneous omics multi-modal data. *Bioinformatics*, **32**, 1–8.
- Yu, G.C. et al. (2012) clusterProfiler: an R package for comparing biological themes among gene clusters. *Omics J. Integr. Biol.*, **16**, 284–287.
- Zelnik-Manor, L. and Perona, P. (2004) Self-tuning spectral clustering. In: *Proceedings of the 17th International Conference on Neural Information Processing Systems*. MIT Press, Vancouver, British Columbia, Canada, pp. 1601–1608.
